# Supplementary material for: Increased hole mobility in anti-ThCr2Si2-type La2O2Bi co-sintered with alkaline earth metal oxides for oxygen intercalation and hole carrier doping
Source: Royal Society of Chemistry journal article supplement (doi:10.1039/d0dt04288a), 2021-01-01
Supplement: d0dt04288a1.pdf [file d0dt04288a1.pdf]

**Supplementary Information**

**Increased hole mobility in anti-ThCr<sub>2</sub>Si<sub>2</sub>-type La<sub>2</sub>O<sub>2</sub>Bi co-sintered with  
alkaline earth metal oxides for oxygen intercalation and hole carrier  
doping**

Kota Matsumoto,<sup>a</sup> Hideyuki Kawasoko,<sup>a</sup> Noriaki Kimura,<sup>b</sup> and Tomoteru Fukumura<sup>\*a,c</sup>.

<sup>a</sup>*Department of Chemistry, Graduate School of Science, Tohoku University, Sendai 980-8578, Japan*

<sup>b</sup>*Department of Physics, Graduate School of Science; Center for Low Temperature Science, Tohoku University, Sendai 980-8578, Japan*

<sup>c</sup>*Advanced Institute for Materials Research and Core Research Cluster, Tohoku University, Sendai 980-8577, Japan*

\* [tomoteru.fukumura.e4@tohoku.ac.jp](mailto:tomoteru.fukumura.e4@tohoku.ac.jp)

**Table S1** Crystal structural parameters for  $\text{La}_2\text{O}_x\text{Bi}$  with different nominal composition ( $R_{\text{wp}}$ :  $R$ -factor,  $R_e$ : expected  $R$ -factor,  $S$ : goodness-of-fit indicator).

| $\text{La}_2\text{O}_x\text{Bi}$        | $x = 1.0$                        | $x = 1.1$                        | $x = 1.2$                        | $x = 1.3$                        | $x = 1.4$                        | $x = 1.5$                        | $x = 1.6$                        | $x = 1.7$                        | $x = 1.8$                        | $x = 1.9$                        | $x = 2.0$                        |
|-----------------------------------------|----------------------------------|----------------------------------|----------------------------------|----------------------------------|----------------------------------|----------------------------------|----------------------------------|----------------------------------|----------------------------------|----------------------------------|----------------------------------|
| Phase                                   | $\text{La}_2\text{O}_2\text{Bi}$ |
| Space group                             | $I4/mmm$                         |
| $a$ (Å)                                 | 4.1064(2)                        | 4.1004(1)                        | 4.0930(1)                        | 4.0895(2)                        | 4.0860(1)                        | 4.0871(1)                        | 4.0845(1)                        | 4.0844(2)                        | 4.0850(1)                        | 4.0867(1)                        | 4.0885(1)                        |
| $c$ (Å)                                 | 13.4018(12)                      | 13.5187(7)                       | 13.6298(7)                       | 13.7177(9)                       | 13.7612(5)                       | 13.8370(6)                       | 13.9698(6)                       | 13.9800(10)                      | 13.9856(6)                       | 13.9911(7)                       | 13.9953(8)                       |
| $c/a$                                   | 3.2636                           | 3.2969                           | 3.33                             | 3.3543                           | 3.3679                           | 3.3855                           | 3.4203                           | 3.4223                           | 3.4236                           | 3.4236                           | 3.4231                           |
| $\text{La}_2\text{O}_2\text{Bi}$ (mol%) | 51.1                             | 76.8                             | 86.3                             | 89.6                             | 100                              | 100                              | 100                              | 67.9                             | 77.2                             | 54                               | 42.4                             |
| LaBi (mol%)                             | 23.8                             | 15.9                             | 13.7                             | 10.4                             | 0                                | 0                                | 0                                | 0                                | 0                                | 0                                | 0                                |
| $\text{La}_2\text{Bi}$ (mol%)           | 25                               | 7.3                              | 0                                | 0                                | 0                                | 0                                | 0                                | 0                                | 0                                | 0                                | 0                                |
| $\text{La}_2\text{O}_3$ (mol%)          | 0                                | 0                                | 0                                | 0                                | 0                                | 0                                | 0                                | 32.1                             | 22.8                             | 46                               | 47.6                             |
| $R_{\text{wp}}$                         | 2.358                            | 2.323                            | 2.133                            | 1.736                            | 1.647                            | 1.672                            | 1.742                            | 1.589                            | 1.684                            | 2.025                            | 2.282                            |
| $R_e$                                   | 1.401                            | 1.445                            | 1.44                             | 1.436                            | 1.46                             | 1.449                            | 1.407                            | 1.43                             | 1.411                            | 1.781                            | 1.797                            |
| $S$                                     | 1.6832                           | 1.6073                           | 1.4809                           | 1.2087                           | 1.1278                           | 1.1545                           | 1.2379                           | 1.114                            | 1.1935                           | 1.2929                           | 1.2694                           |

**Table S2** Lattice parameters of Bi impurity phase in  $\text{La}_2\text{O}_2\text{Bi}$  ( $x_{\text{Sr}} = 0.16, 0.20, x_{\text{Ba}} = 0.10, 0.20$ ). The longer  $a$ - and  $c$ - axis lengths for Ba doping were possibly due to the formation of Bi-Ba alloy.<sup>1</sup>

|             | $x_{\text{Sr}} = 0.16$ | $x_{\text{Sr}} = 0.20$ | $x_{\text{Ba}} = 0.10$ | $x_{\text{Ba}} = 0.20$ |
|-------------|------------------------|------------------------|------------------------|------------------------|
| Phase       | Bi                     | Bi                     | Bi                     | Bi                     |
| Space group | $R-3m$                 | $R-3m$                 | $R-3m$                 | $R-3m$                 |
| $a$ (Å)     | 4.5508(18)             | 4.5506(13)             | 4.5548(12)             | 4.5504(4)              |
| $c$ (Å)     | 11.8404(77)            | 11.8438(49)            | 11.8586(52)            | 11.8677(18)            |

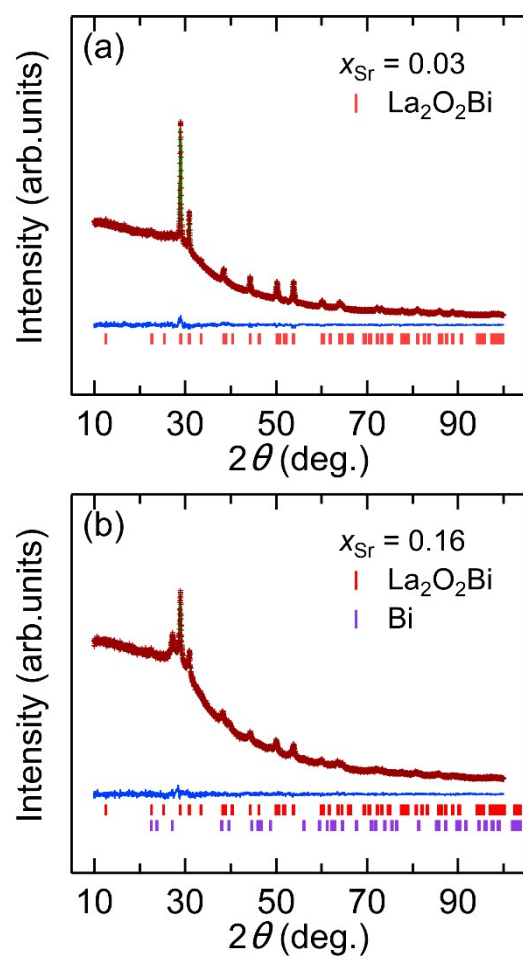

**Fig. S1** XRD patterns and the fitting results of Rietveld refinement for (a)  $x_{\text{Sr}} = 0.03$ , and (b)  $x_{\text{Sr}} = 0.16$ . Brown, green, and blue curves denote the measurement data, simulation pattern, and their difference, respectively.

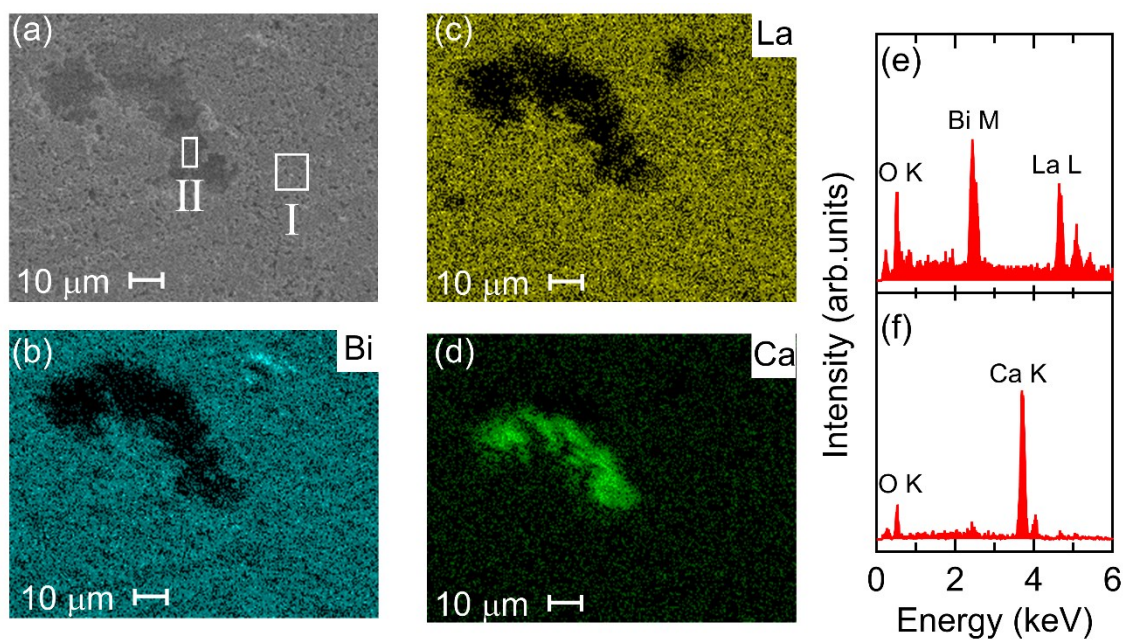

**Fig. S2** (a) SEM image and the EDX mappings of (b) Bi, (c) La, (d) Ca for  $\text{La}_2\text{O}_2\text{Bi}$  ( $x_{\text{Ca}} = 0.20$ ). EDX spectra in the selected areas of (e) I and (f) II in (a). Ca was segregated locally, and La and Bi were distributed homogeneously.

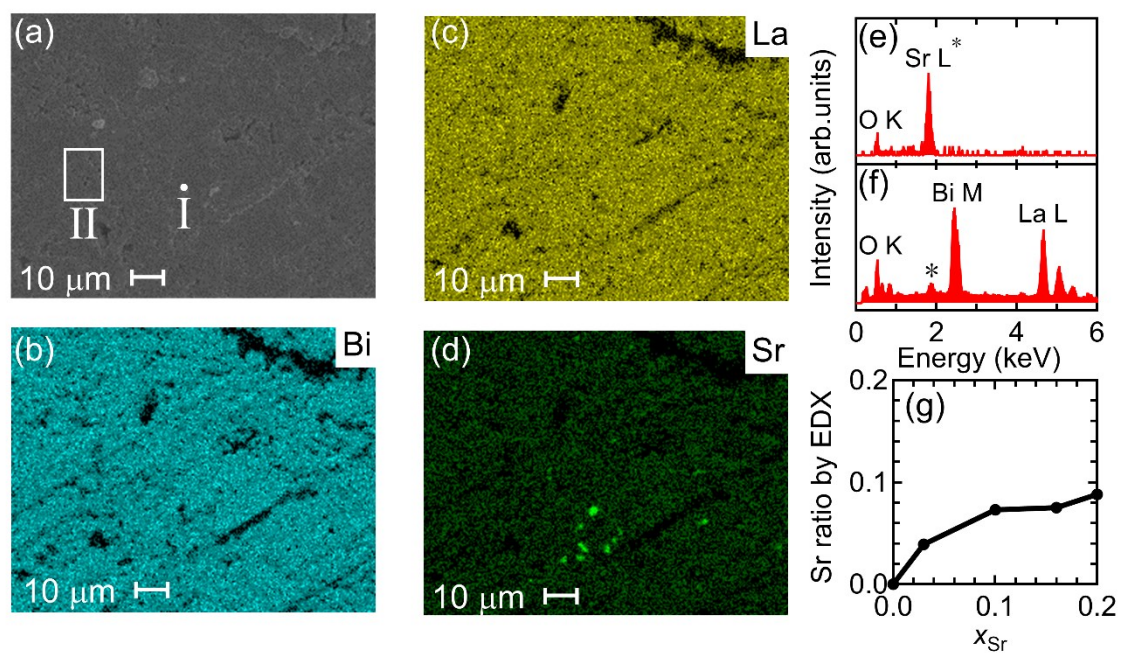

**Fig. S3** (a) SEM image and the EDX mappings of (b) Bi, (c) La, (d) Sr for  $\text{La}_2\text{O}_2\text{Bi}$  ( $x_{\text{Sr}} = 0.10$ ). EDX spectra (e) at the point I on a SrO grain and (f) in the area II displayed in (a). Bi and La peaks were absent in (e) because only the SrO grain was excited by the point focused measurement.<sup>2</sup> (g) Sr substitution ratio calculated by  $\text{Sr}/(\text{Sr} + \text{La})$  from EDX as a function of  $x_{\text{Sr}}$ . Sr was distributed almost homogeneously with a tiny segregation. The solubility limit of Sr was about 0.09.

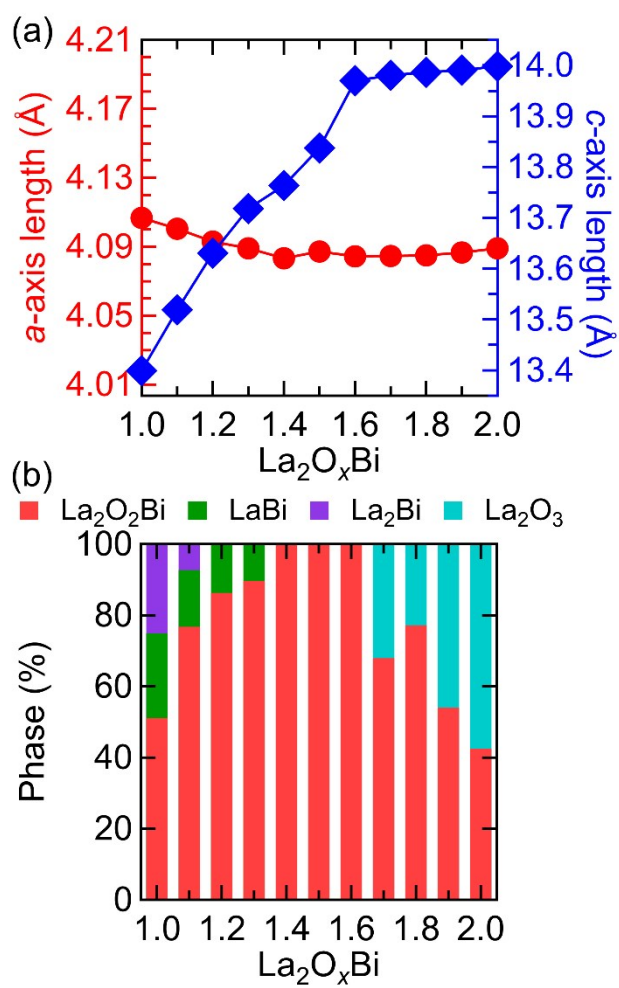

**Fig. S4** (a)  $a$ - and  $c$ -axis lengths and (b) molar fractions of constituent phases for  $\text{La}_2\text{O}_x\text{Bi}$  synthesized with different nominal composition.

### Supplementary reference

- 1 T. Lichtenstein, N. D. Smith, J. Gesualdi, K. Kumar and H. Kim, *Electrochim. Acta*, 2017, **228**, 628–635.
- 2 J. I. Goldstein, C. E. Lyman, D. E. Newbury, E. Lifshin, P. Echlin, L. Sawyer, D. C. Joy and J. R. Michael, *Scanning Electron Microscopy and X-Ray Microanalysis*, Springer, New York, 3rd ed., 2003.
